# Supplementary material for: Proanthocyanidins Antagonize Arsenic-Induced Oxidative Damage and Promote Arsenic Methylation through Activation of the Nrf2 Signaling Pathway
Source: Hindawi journal article supplement (doi:10.1155/2019/8549035), 2019-01-20
Supplement: f1 [file 8549035.f1.doc]

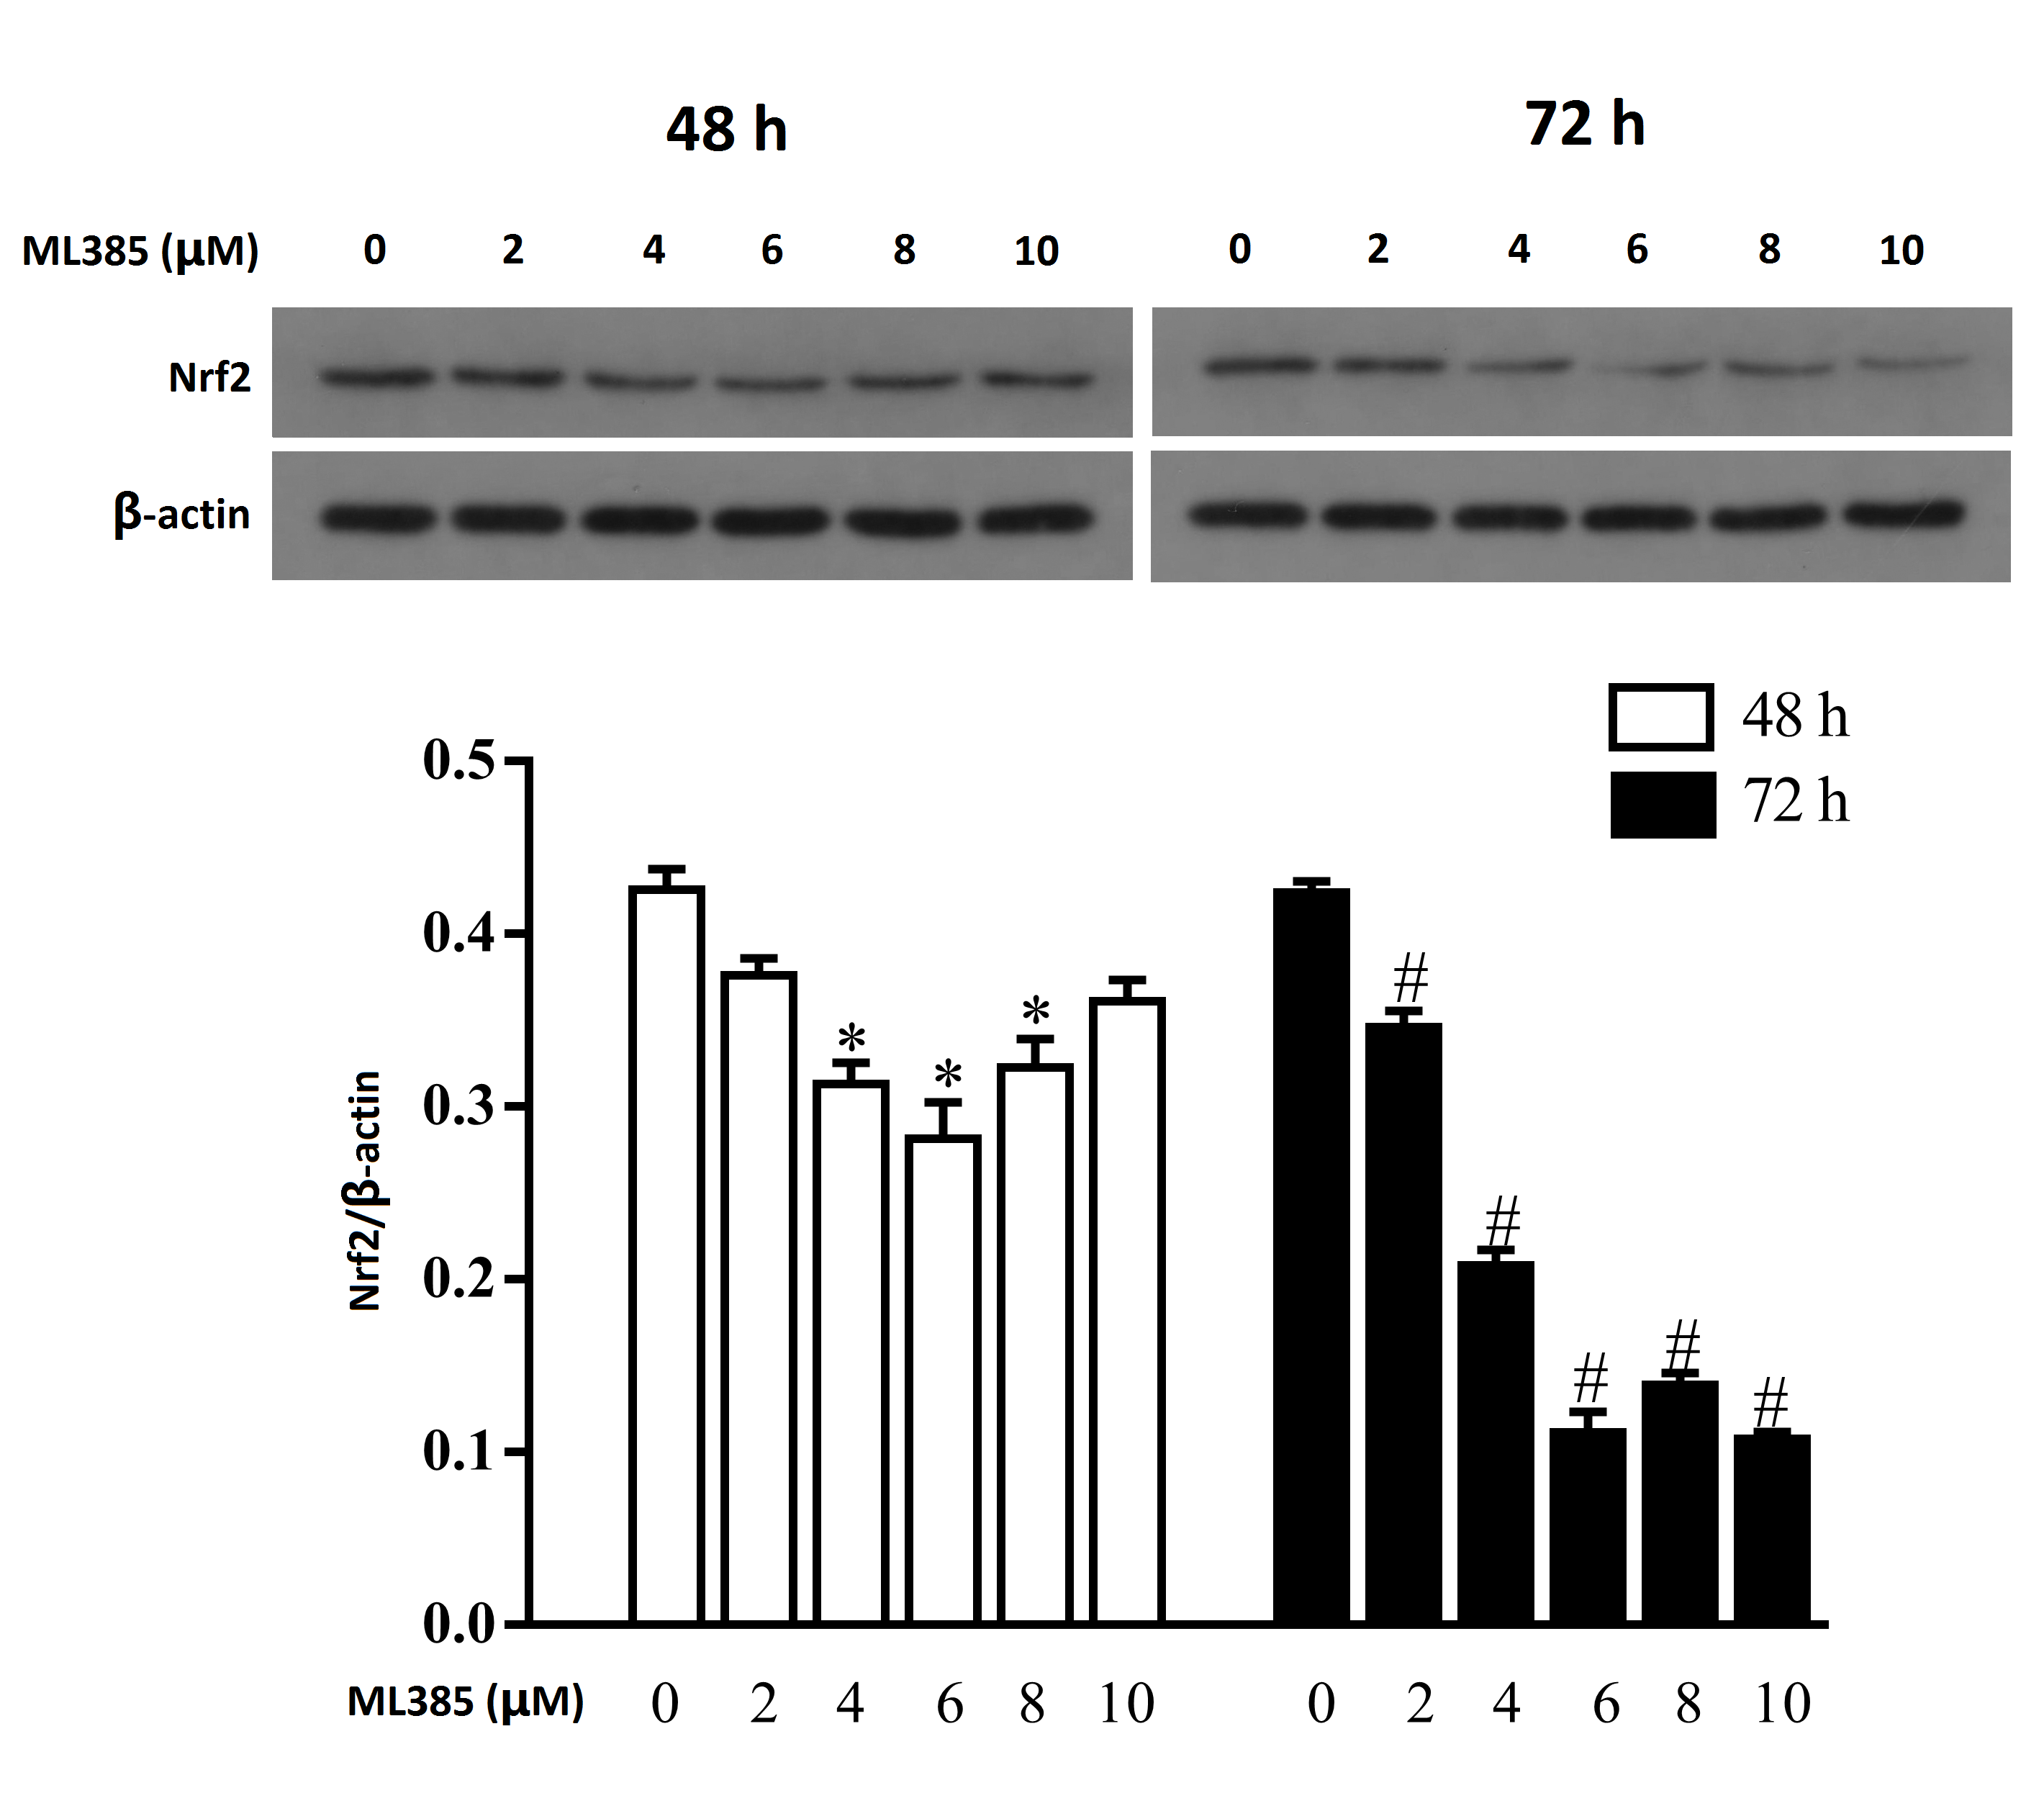


**Figure S1. The inhibition effect of ML385 on Nrf2 (Mean ± SD, n = 3).** *: versus control group of 48 h, *P* < 0.05; #: versus control group of 72 h, *P* < 0.05. ML385 was used to inhibit the expression of Nrf2. The concentration of ML385 standard was 10 mmol/L. The medium without penicillin-streptomycin was used to dilute the standard to 2, 4, 6, 8, and 10 μmol/L. L-02 cells were treated with the diluted standard for 48 and 72 h. The optimal intervention concentration (6 μM) and intervention time (72 h) were screened according to Nrf2 expression.


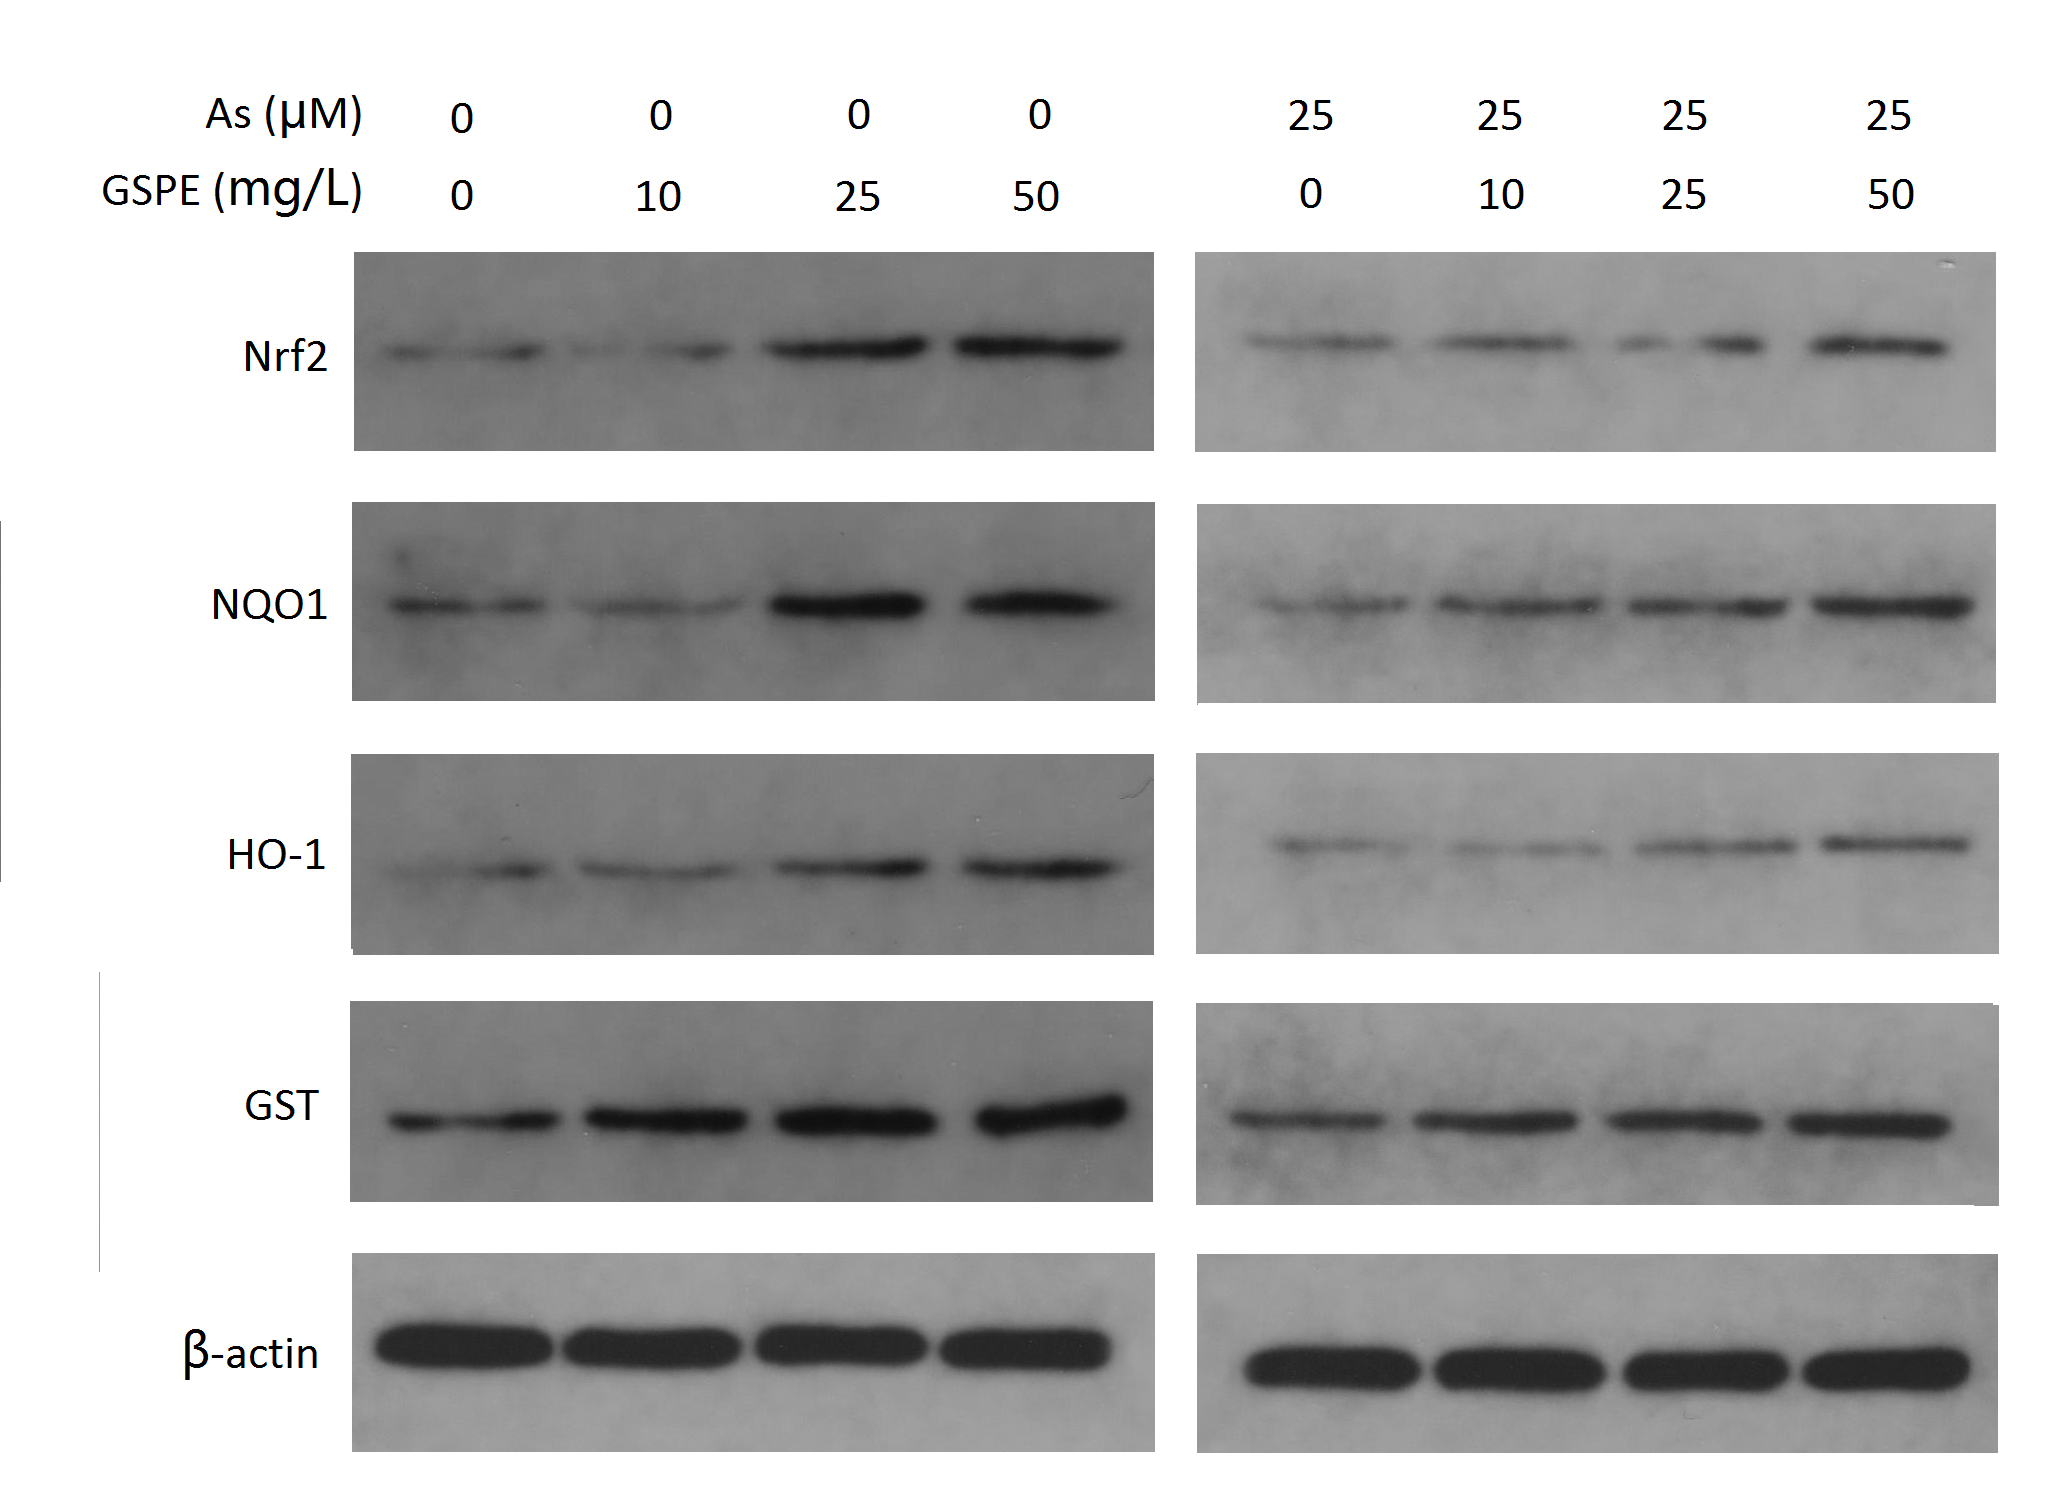


Figure S2. **Proteins expression of Nrf2 pathway in Nrf2-suppressed cells (Mean ± SD, n = 3).** After Nrf2 inhibition, the proteins expression of Nrf2 and its downstream genes were decreased in control group. 25 and 50 mg/L GSPE could increase the protein expression of Nrf2 and its downstream genes significantly compared with control group. Arsenic intervention led to further decrease than control group. And GSPE could attenuate the effect of arsenic, but the effect of GSPE after Nrf2 inhibition on arsenic was lower than that of Nrf2 normal.
